# Supplementary material for: Reduction in Neural-Tube Defects after Folic Acid Fortification in Canada
Source: Atypon-hosted journal article supplement (doi:10.1056/nejmoa067103), 2007-07-11
Supplement: nejm_de_wals_135sa1.pdf [file nejm_de_wals_135sa1.pdf]

## Supplementary Appendix

This appendix has been provided by the authors to give readers additional information about their work.

Supplement to: De Wals P, Tairou F, Van Allen MI, et al. Reduction in neural-tube defects after folic acid fortification in Canada. *N Engl J Med* 2007;357:135-42.

**WEB-ONLY SUPPLEMENT**

*Web-Only Tables 1 and 2 correspond with Tables 2 and 3 of the published article, respectively.*

**Web-Only Table 1.** Number of Cases of Neural Tube Defects and Total Livebirths and Stillbirths According to Diagnostic Category and to Fortification Period in 7 Canadian Provinces.

| <b>Diagnostic Category</b> | <b>Pre-Fortification</b> | <b>Partial Fortification</b> | <b>Full Fortification</b> |
|----------------------------|--------------------------|------------------------------|---------------------------|
| Anencephaly                | 501                      | 173                          | 156                       |
| Encephalocele              | 168                      | 57                           | 58                        |
| Iniencephaly               | 20                       | 2                            | 1                         |
| Spina bifida               | 830                      | 260                          | 196                       |
| Unspecified NTD            | 14                       | 4                            | 6                         |
| All NTDs                   | 1,533                    | 496                          | 417                       |
| Livebirths and Stillbirths | 970,191                  | 455,889                      | 487,034                   |

**Web-Only Table 2.** Number of Cases of Neural Tube Defect (and Total Livebirths and Stillbirths) According to Fortification Period in 7 Canadian Provinces.

| <b>Province</b>           | <b>Pre-Fortification<sup>1</sup></b> | <b>Partial Fortification<sup>2</sup></b> | <b>Full Fortification<sup>3</sup></b> |
|---------------------------|--------------------------------------|------------------------------------------|---------------------------------------|
| Newfoundland and Labrador | 131 (28,727)                         | 18 (12,666)                              | 10 (13,135)                           |
| Prince Edward Island      | 17 (8,183)                           | 4 (3,784)                                | 0 (3,756)                             |
| Nova Scotia               | 142 (52,226)                         | 32 (24,212)                              | 31 (24,660)                           |
| Quebec                    | 701 (395,681)                        | 227 (178,827)                            | 186 (191,059)                         |
| Manitoba                  | 121 (78,727)                         | 32 (36,267)                              | 36 (38,692)                           |
| Alberta                   | 207 (184,440)                        | 68 (93,698)                              | 70 (103,690)                          |
| British Columbia          | 214 (222,207)                        | 115 (106,435)                            | 84 (112,042)                          |

<sup>1</sup> January 1, 1993 to September 30, 1997

<sup>2</sup> October 1, 1997 to March 31, 2000

<sup>3</sup> April 1, 2000 to December 31, 2002
